# Supplementary material
Source: PubMed Central journal article supplement (PMC6060716)
Supplement: TX-005-C5TX00236B-s001.pdf [file TX-005-C5TX00236B-s001.pdf]

## Electronic Supplementary Information

### Evaluation of CdTe/CdS/ZnS core/shell/shell quantum dots toxicity on three-dimensional spheroid cultures

Mehriban Ulusoy,<sup>a</sup> Antonina Lavrentieva,<sup>a</sup> Johanna-Gabriela Walter,<sup>a</sup> Franziska Sambale,<sup>a</sup>  
Mark Green,<sup>b</sup> Frank Stahl\*<sup>a</sup> and Thomas Scheper<sup>a</sup>

<sup>a</sup> *Gottfried Wilhelm Leibniz University of Hannover, Institute of Technical Chemistry, 30167 Hannover, Germany. E-mail: stahl@iftc.uni-hannover.de*

<sup>b</sup> *King's College London, Department of Physics, The Strand, WC2R 2LS London, UK*

### Supplementary Figures

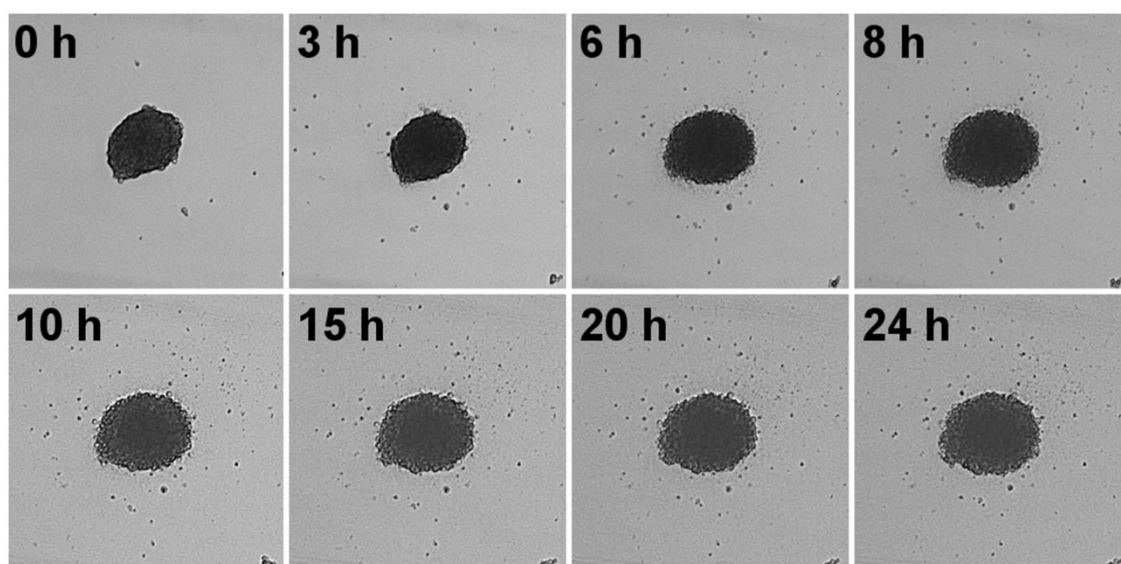

**Fig. S1** Time-lapse microscope images of hAD-MSCs spheroids treated with 1200 µg/ml Qdot solution. Qdots were introduced to the spheroid after cells were incubated for 24 h for spheroid formation ( $t_{\text{QDOT}} = 24$  h). Effect of Qdots to spheroid morphology was monitored for 24 h.

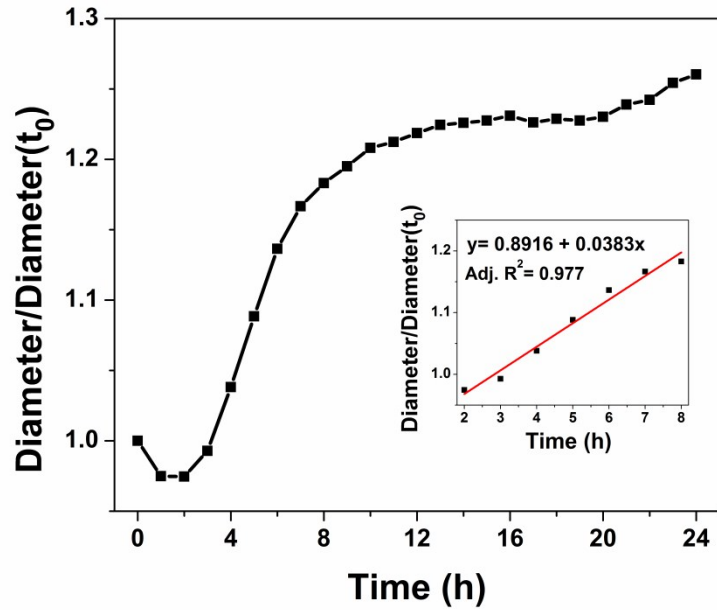

**Fig. S2** Increase in hAD-MSCs spheroid diameters during Qdot exposure (1200 µg/ml) until 24 h. Spheroid diameters were normalized to the diameter of spheroid at the time= 0 h. Inset graph shows the linear relationship between the Qdot exposure time and the increase in spheroid diameter until 8 h (Adj. R<sup>2</sup>=0.977).

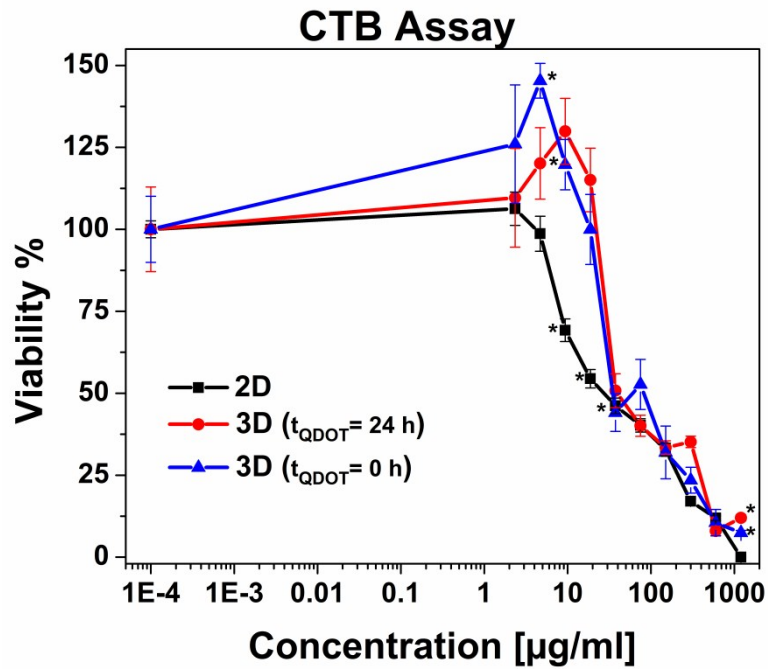

**Fig. S3** Cell viability data obtained from CTB assay. The fluorescence signals were normalized to untreated control samples. Data points are means ± standard error of 3±1 independent experiments which were conducted with 4 replicates. \* indicates significant difference at 0.01 level.  $p < \alpha=0.01$  (ANOVA one-way).
